# Supplementary material for: Assessing blue orchard bee ( Osmia lignaria ) propagation and pollination services in the presence of honey bees ( Apis mellifera ) in Utah tart cherries
Source: PeerJ journal article supplement (doi:10.7717/peerj.7639), 2019-09-05
Supplement: Raw_Data_for_PeerJ.xlsx [file Raw_Data_for_PeerJ.xlsx]

## Sheet: 2017 Olig reproduction data
	Santaquin Cherries 2017			female count				male count											PARA (likely em chalcid?)			tube size			subset counted				estmiated total
Block	BOX	# nests	# cells	live fem	xf	dfpu	total fem	live male	xm	dmpu	total male	PB	DPP	DL	Tricr	ST	CH	SCAV		total cells	dead dev	SMALL	LARGE	cell/nes	nest counted	cells ctd	F counted	M counted	est cell	est F	est M	PARASITIZED
																																0
2	BOB N R87 T5	53	301	93	0	0	93	185	0	0	185	19	4	0	0	0	0	0	0	301	4	19	34	5.67925	53	301	93	185	301	93	185	3
2	BOB N R87 T14	72	362	129	0	0	129	204	0	0	204	18	8	0	0	0	0	2	1	362	8	18	54	5.02778	72	362	129	204	362	129	204	1
2	BOB N R87 T21	53	302	91	0	0	91	184	0	0	184	16	8	1	0	0	0	0	1	301	9	0	53	5.69811	53	302	91	184	302	91	184	0
2	BOBN R87 T31	89	512	168	0	0	168	311	0	0	311	25	8	0	0	0	0	0	0	512	8	64	25	5.75281	89	512	168	311	512	168	311	1
2	BOB N R91 T22	22	120	35	0	0	35	72	0	0	72	8	2	1	0	0	0	1	0	119	3	0	22	5.45455	22	120	35	72	120	35	72	1
2	BOB N R92 T5	24	133	51	0	0	51	72	0	0	72	8	1	0	0	0	0	0	1	133	1	0	24	5.54167	24	133	51	72	133	51	72	1
2	BOB N R92 T22	18	108	25	0	0	25	63	0	0	63	16	2	0	0	0	0	0	1	107	2	0	18	6	18	108	25	63	108	25	63	1
2	BOB N R92 T14	23	127	25	0	0	25	83	0	0	83	13	5	0	0	0	0	0	1	127	5	0	23	5.52174	23	127	25	83	127	25	83	0
2	BOBN R92 T32	87	468	161	0	0	161	259	0	0	259	33	9	5	0	0	0	0	0	467	14	4	83	5.37931	86	468	161	259	473.442	162.872	262.012	0
2	BOB N R97 T5	30	140	58	0	0	58	66	0	0	66	8	4	4	0	0	0	0	0	140	8	0	30	4.66667	27	140	58	66	155.556	64.4444	73.3333	0
2	BOB N R97 T14	47	224	79	0	0	79	124	0	0	124	11	7	3	0	0	0	0	0	224	10	32	15	4.76596	47	224	79	124	224	79	124	1
2	BOB N R97 T31	14	68	22	0	0	22	38	0	0	38	4	3	0	0	0	0	0	1	68	3	7	7	4.85714	14	68	22	38	68	22	38	0
																									528	2865	937	1661
		44.3333	238.75	78.0833			78.0833	138.417			138.417	14.9167								238.417	6.25			5.36208								0.75
		26.8407	149.021	51.9763			51.9763	88.4158			88.4158	8.19599								148.996	3.86417			0.431213								0.866025
		7.74825	43.0187	15.0043			15.0043	25.5234			25.5234	2.36598								43.0114	1.11549			0.124481								0.25
	Santaquin Cherries 2017			female count				male count											PARA (likely em chalcid?)			tube size			subset counted				estmiated total
Block	BOX	# nests	# cells	live fem	xf	dfpu	total fem	live male	xm	dmpu	total male	PB	DPP	DL	Tricr	ST	CH	SCAV		total cells	dead dev	SMALL	LARGE	cells/nest	nest counted	cells ctd	F counted	M counted	est cell	est F	est M	PARASITIZED
	BOBS R29 T14	36	183	64	0	0	64	109	1	0	110	6	0	0	0	0	0	3	0	183	1	36	0	5.08333	36	183	64	109	183	64	109	3
1	BOB S R29 T6	43	221	84	0	0	84	109	1	0	110	17	7	1	0	0	0	0	2	221	9	27	16	5.13953	43	221	84	109	221	84	109	2
1	BOBS R29 T23	3	13	0	0	0	0	7	0	0	7	1	3	0	0	0	0	2	0	13	3	3	0	4.33333	3	13	0	7	13	0	7	2
1	BOBS R29 T31	24	91	19	0	0	19	60	0	0	60	8	1	1	0	0	0	0	2	91	2	24	0	3.79167	24	91	19	60	91	19	60	2
1	BOBS R36 T21	50	271	102	0	0	102	151	0	0	151	12	6	0	0	0	0	0	0	271	6	1	50	5.42	51	271	102	151	265.686	100	148.039	0
1	BOBS R36 T31	29	126	33	0	0	33	77	0	0	77	7	5	0	0	0	0	1	3	126	5	18	11	4.34483	29	126	33	77	126	33	77	4
1	BOBS R41 T5	119	598	199	0	0	199	350	0	0	350	20	15	2	0	0	0	12	0	598	17	118	1	5.02521	119	598	199	350	598	199	350	12
1	BOBS R41 T14	25	122	38	1	0	39	72	0	0	72	5	4	0	0	0	0	2	0	122	5	0	25	4.88	25	122	38	72	122	38	72	2
1	BOBS R41 T22	40	231	93	0	0	93	108	0	0	108	15	6	7	0	0	0	2	0	231	13	5	35	5.775	40	231	93	108	231	93	108	2
1	BOB 5 R36 T5	24	121	36	0	0	36	74	0	0	74	10	0	1	0	0	0	0	0	121	1	0	24	5.04167	24	121	36	74	121	36	74	0
1	BOB5 R36 T14	21	108	38	0	0	38	55	0	0	55	8	6	1	0	0	0	0	0	108	7	4	17	5.14286	21	108	38	55	108	38	55	0
1	BOB 5 R41 T30	36	140	46	0	0	46	82	0	0	82	6	4	2	0	0	0	0	0	140	6	10	26	3.88889	36	140	46	82	140	46	82	0
		37.5	185.417	62.6667				104.5			104.667	9.58333									6.25			4.82219								2.41667
		28.4365	147.494	52.5968				85.1047			85.1153	5.48483									4.82654			0.605247								3.28795
		8.20892	42.5778	15.1834				24.5676			24.5707	1.58333									1.3933			0.17472								0.949149
	Santaquin Cherries 2017			female count				male count											PARA (likely em chalcid?)			tube size			subset counted				estmiated total
Block	BOX	# nests	# cells	live fem	xf	dfpu	total fem	live male	xm	dmpu	total male	PB	DPP	DL	Tricr	ST	CH	SCAV		total cells	dead dev	SMALL	LARGE	cells/nest	nest counted	cells ctd	F counted	M counted	est cell	est F	est M	PARASITIZED
3	BOB 3 R124 T6	44	197	67	0	0	67	112	1	0	113	10	2	0	0	0	0	4	1	197	3	24	20	4.47727	44	197	67	112	197	67	112	5
3	BOB 3 R124 T22	16	77	27	0	0	27	40	0	0	40	8	0	0	0	0	0	2	0	77	0	1	15	4.8125	16	77	27	40	77	27	40	2
3	BOB3 R124 T30	58	303	99	0	0	99	177	0	0	177	17	6	3	0	0	0	0	0	302	9	0	58	5.22414	58	303	99	177	303	99	177	0
3	BOB 3 R129 T16	48	244	78	0	0	78	147	0	0	147	14	3	2	0	0	0	0	0	244	5	15	33	5.08333	48	244	78	147	244	78	147	0
3	BOB 3 R129 T6	8	37	7	0	0	7	28	0	0	28	1	1	0	0	0	0	0	0	37	1	0	8	4.625	8	37	7	28	37	7	28	0
3	BOB 3 R129 T23	63	323	81	1	0	82	205	0	0	205	25	6	2	0	0	0	1	2	323	9	0	63	5.12698	63	323	81	205	323	81	205	3
3	BOB 3 R129 T33	51	245	80	0	0	80	142	1	0	143	13	6	3	0	0	0	0	0	245	10	0	51	4.80392	51	245	80	142	245	80	142	0
3	BOB 3 R134 T5	42	214	55	0	0	55	143	1	0	144	10	2	2	0	0	0	0	1	214	5	26	16	5.09524	42	214	55	143	214	55	143	1
3	BOB 3 R134 T14	64	319	68	0	0	68	208	1	0	209	17	7	5	0	0	0	1	12	319	13	57	7	4.98438	64	319	68	208	319	68	208	13
3	BOB 3 R134 T22	47	268	77	0	0	77	155	0	0	155	25	9	2	0	0	0	0	0	268	11	1	46	5.70213	47	268	77	155	268	77	155	0
3	BOB 3 R134 T23	24	112	34	0	0	34	69	0	0	69	8	0	0	0	0	0	0	1	112	0	0	24	4.66667	24	112	34	69	112	34	69	1
3	BOB 3 R134 T31	42	223	79	0	0	79	122	0	0	122	16	3	3	0	0	0	0	0	223	6	25	16	5.30952	42	223	79	122	223	79	122	0
3	BOB N R124 T15	88	508	129	1	0	130	301	0	0	301	37	8	6	0	0	0	2	24	508	15	36	52	5.77273	88	508	129	301	508	129	301	26
			236.154	67.7692			67.9231	142.231			142.538	15.4615						0.769231			6.69231			5.0526								3.92308
			121.289	31.6548			31.8524	73.6287			73.6711	9.30605						1.23517			4.92248			0.390633								7.55493
			35.0131	9.13795			9.195	21.2548			21.267	2.68643						0.356562			1.421			0.112766								2.18092
	Santaquin Cherries 2017			female count				male count											PARA (likely em chalcid?)			tube size			subset counted				estmiated total
Block	BOX	# nests	# cells	live fem	xf	dfpu	total fem	live male	xm	dmpu	total male	PB	DPP	DL	Tricr	ST	CH	SCAV		total cells		SMALL	LARGE		nest counted	cells ctd	F counted	M counted	est cell	est F	est M
1	BOB 5 R36 T5	24	121	36	0	0	36	74	0	0	74	10	0	1	0	0	0	0	0	121		0	24		24	121	36	74	121	36	74
1	BOB5 R36 T14	21	108	38	0	0	38	55	0	0	55	8	6	1	0	0	0	0	0	108		4	17		21	108	38	55	108	38	55
1	BOB 5 R41 T30	36	140	46	0	0	46	82	0	0	82	6	4	2	0	0	0	0	0	140		10	26		36	140	46	82	140	46	82

## Sheet: 2018 Olig reproduction data
	Santaquin Cherries 2017			female count				male count												PARA (likely em chalcid?)
Block	BOX	# nests	# cells	live fem	xf	dfpu	total fem	live male	xm	dmpu	total male	PB	MUMMY	DPP	DL	Tricr	ST	CH	SCAV		total cells	dead dev	cell/nes	PARASITIZED
1	R58 T2	15	101	17	0	0	17	60	7	0	67	11	2	1	3	0	0	0	0	0	101	14	6.73333	0
1	R58 T8	9	50	7	1	0	8	18	3	1	22	11	0	4	5	0	0	0	0	0	50	11	5.55556	0
1	R58 T15	8	52	10	0	0	10	26	2	0	28	5	0	1	8	0	0	0	0	0	52	8	6.5	0
1	R58 T22	13	70	17	0	0	17	38	2	0	40	7	1	3	2	0	0	0	0	0	70	8	5.38462	0
1	R58 T29	3	24	3	2	0	5	9	5	1	15	4	0	0	0	0	0	0	0	0	24	0	8	0
1	R58 T36	0	0	0	0	0	0	0	0	0	0	0	0	0	0	0	0	0	0	0	0	17	NA	0
1	R66 T2	31	190	38	0	0	38	114	2	0	116	21	5	6	4	0	0	0	0	0	190	13	6.12903	0
1	R66 T8	10	63	17	0	0	17	25	5	0	30	8	5	1	2	0	0	0	0	0	63	4	6.3	0
1	R66 T15	8	44	13	0	0	13	22	1	1	24	5	0	2	0	0	0	0	0	0	44	14	5.5	0
1	R66 T22	28	165	38	0	0	38	95	5	0	100	18	3	5	1	0	0	0	0	0	165	2	5.89286	0
1	R66 T29	5	20	8	0	0	8	9	0	1	10	1	0	0	1	0	0	0	0	0	20	10	4	0
1	R66 T37	10	48	7	1	0	8	28	4	0	32	3	1	2	2	0	0	0	0	0	48	2	4.8	0
1	R74 T1	8	28	11	0	0	11	12	0	0	12	3	0	0	2	0	0	0	0	0	28	0	3.5	0
1	R74 T9	2	9	0	0	0	0	0	0	0	0	9	0	0	0	0	0	0	0	0	9	13	4.5	0
1	R74 T15	15	88	19	1	0	20	42	1	1	44	14	3	4	3	0	0	0	0	0	88	8	5.86667	0
1	R74 T23	9	61	13	0	0	13	30	3	1	34	10	2	1	1	0	0	0	0	0	61	0	6.77778	0
1	R74 T29	3	12	2	0	0	2	7	0	0	7	3	0	0	0	0	0	0	0	0	12	11	4	0
1	R74 T36	6	39	10	0	0	10	15	10	1	26	3	0	0	0	0	0	0	0	0	39	0	6.5	0
	AVERAGE	10.1667	59.1111	12.7778			13.0556	30.5556			33.7222	7.55556									59.1111	7.5	5.64352	0
	ST DEV	8.19074	50.826	10.8766			10.7565	31.0563			31.7431	5.80286									50.826	5.76245	1.18281	0
		1.93058	11.9798	2.56364			2.53533	7.32005			7.48192	1.36775									11.9798	1.35822	0.27879	0
	Santaquin Cherries 2017			female count				male count												PARA (likely em chalcid?)
Block	BOX	# nests	# cells	live fem	xf	dfpu	total fem	live male	xm	dmpu	total male	PB	MUMMY	DPP	DL	Tricr	ST	CH	SCAV		total cells	dead dev	cell/nes	PARASITIZED
2	R175 T36	2	9	3	0	0	3	4	1	0	5	0	1	0	0	0	0	0	0	0	9	0	4.5	0
2	R175 T30	3	14	2	0	0	2	8	0	0	8	4	0	0	0	0	0	0	0	0	14	5	4.66667	0
2	R175 T22	10	64	13	0	0	13	34	0	0	34	11	1	2	2	0	0	0	0	1	64	2	6.4	1
2	R175 T15	4	25	3	0	0	3	18	1	0	19	2	1	0	0	0	0	0	0	0	25	11	6.25	0
2	R175 T9	9	57	7	0	0	7	26	6	0	32	13	0	2	3	0	0	0	0	0	57	14	6.33333	0
2	R175 T1	12	92	25	2	1	28	46	4	1	51	7	1	4	1	0	0	0	0	0	92	8	7.66667	0
2	R167 T36	10	52	10	1	0	11	25	6	0	31	9	0	1	0	0	0	0	0	0	52	1	5.2	0
2	R167 T29	5	30	6	0	0	6	23	0	0	23	0	0	1	0	0	0	0	0	0	30	5	6	0
2	R167 T22	9	36	3	0	0	3	14	3	0	17	14	1	1	0	0	0	0	0	0	36	1	4	0
2	R167 T15	4	22	3	0	0	3	15	0	0	15	3	0	1	0	0	0	0	0	0	22	10	5.5	0
2	R167 T8	17	118	33	2	1	36	64	0	0	64	11	0	1	6	0	0	0	0	0	118	0	6.94118	0
2	R167 T1	2	14	0	0	0	0	12	0	0	12	2	0	0	0	0	0	0	0	0	14	11	7	0
2	R159 T22	14	90	19	0	0	19	50	1	1	52	10	2	6	1	0	0	0	0	0	90	38	6.42857	0
2	R159 T 15	21	128	21	9	0	30	61	16	1	78	8	4	4	4	0	0	0	0	0	128	6	6.09524	0
2	R159 T8	6	42	6	2	0	8	27	0	1	28	3	1	2	0	0	0	0	0	0	42	9	7	0
2	R159 T1	4	26	0	1	1	2	12	6	0	18	5	0	0	1	0	0	0	0	0	26	2	6.5	0
2	R159 T36	4	21	7	0	0	7	11	1	0	12	1	1	0	0	0	0	0	0	0	21	0	5.25	0
2	R159 T29	0	0	0	0	0	0	0	0	0	0	0	0	0	0	0	0	0	0	0	0	0	0	0
	AVERAGE	7.55556	46.6667	8.94444			10.0556	25			27.7222	5.72222									46.6667	6.83333	5.65176	0.0555556
	ST DEV	5.66955	37.8697	9.56385			10.9892	18.9923			21.257	4.72547									37.8697	9.01796	1.71048	0.235702
		1.33633	8.92598	2.25422			2.59017	4.47652			5.01032	1.1138									8.92598	2.12555	0.403163	0.0555556
	Santaquin Cherries 2017			female count				male count												PARA (likely em chalcid?)
Block	BOX	# nests	# cells	live fem	xf	dfpu	total fem	live male	xm	dmpu	total male	PB	MUMMY	DPP	DL	Tricr	ST	CH	SCAV		total cells	dead dev	cell/nes	PARASITIZED
3	R86 T36	28	188	37	0	0	37	84	4	1	89	41	9	9	3	0	0	0	0	0	188	12	6.71429	0
3	R86 T28	24	160	38	0	0	38	98	4	1	103	12	3	3	1	0	0	0	0	0	160	1	6.66667	0
3	R86 T23	7	37	7	0	0	7	27	0	1	28	2	0	0	0	0	0	0	0	0	37	16	5.28571	0
3	R86 T15	6	31	2	1	0	3	9	9	2	20	4	2	0	2	0	0	0	0	0	31	0	5.16667	0
3	R86 T8	1	1	1	0	0	1	0	0	0	0	0	0	0	0	0	0	0	0	0	1	0	1	0
3	R86 T1	4	28	3	0	0	3	21	0	0	21	4	0	0	0	0	0	0	0	0	28	35	7	0
3	R78 T36	36	232	47	0	0	47	125	9	1	135	25	4	10	11	0	0	0	0	0	232	2	6.44444	0
3	R78 T30	4	20	1	0	0	1	11	0	0	11	5	1	0	1	1	0	0	0	0	20	33	5	1
3	R78 T22	36	222	50	2	0	52	114	10	0	124	25	7	9	5	0	0	0	0	0	222	16	6.16667	0
3	R78 T15	13	64	15	0	0	15	28	8	0	36	5	1	2	5	0	0	0	0	0	64	10	4.92308	0
3	R78 T8	10	54	6	0	0	6	20	1	0	21	18	1	4	4	0	0	0	0	0	54	26	5.4	0
3	R78 T1	40	245	48	2	0	50	143	4	0	147	28	7	12	1	0	0	0	0	0	245	10	6.125	0
3	R70 T36	10	56	12	0	0	12	30	3	0	33	4	3	2	2	0	0	0	0	0	56	10	5.6	0
3	R70 T30	3	19	0	0	0	0	5	1	0	6	4	1	0	8	0	0	0	0	0	19	7	6.33333	0
3	R70 T21	11	60	9	0	0	9	36	2	0	38	8	1	3	1	0	0	0	0	0	60	0	5.45455	0
3	R70 T15	3	15	5	0	0	5	8	0	0	8	2	0	0	0	0	0	0	0	0	15	7	5	0
3	R70 T8	2	9	0	0	0	0	0	6	0	6	2	0	0	1	0	0	0	0	0	9	5	4.5	0
3	R70 T3	11	53	13	0	0	13	30	2	0	32	5	0	3	0	0	0	0	0	0	53	0	4.81818	0
	AVERAGE	13.8333	83	16.3333			16.6111	43.8333			47.6667	10.7778									83	10.5556	5.42214	0.0555556
	ST DEV	12.9672	84.3013	18.4199			18.7997	46.581			48.518	11.6496									84.3013	11.0306	1.33118	0.235702
		3.05639	19.87	4.34162			4.43113	10.9793			11.4358	2.74583									19.87	2.59993	0.313763	0.0555556

## Sheet: 2017CherryYield
Treatment	row	tree	count	count	count	count	count	count	total count blossoms and buds	fruit @ harvest	%set	wt of fruit @ harvest	individ cherry wt (g)	Diam (mm)	Circ(mm)	(LCSA)	Notes	Fruit per LCSA	lcsa	propset	wtperfrt
BOB1	29	3	303	282	303				888	250	0.281532	75.7	3.785	34.2		918.167	22 weighed	0.272282	0.183461	0.218856	4.1449
BOB1	31	3	79	181	152	326			738	119	0.161247	84.78	4.239	25.6		514.458		0.231312	0.0900454	0.0645168	0.452629
BOB1	34	3	126	144	138				408	114	0.279412	94.92	4.746	31.6		783.87		0.145432	0.0206578	0.0148012	0.10384
BOB1	37	3	423						423	59	0.13948	86.09	4.3045	24.8		482.806		0.122202
BOB1	40	3	299	144	154	86			683	184	0.2694	95.42	4.771	25.8		522.527		0.352135
BOB1	43	3	632						632	122	0.193038	88.8	4.44	28.7		646.597		0.18868
BOB1	45	3	182	95	79	140			496	98	0.197581	92.14	4.607	39.1		1200.12		0.0816588
BOB1	45	18	275	319	128	123			845	169	0.2	87.7	4.385	34.5		934.346		0.180875
BOB1	43	18	181	221	105				507	137	0.270217	75.64	3.782	28.8		651.11		0.21041
BOB1	41	17	155	74	74				303	86	0.283828	63.16	3.158	33.5		880.966		0.0976201
BOB1	37	19	100	126	82				308	79	0.256494	82.09	4.1045	27.6		597.982		0.132111
BOB1	33	18	128	302					430	80	0.186047	76.25	3.8125	35.4		983.731		0.0813231
BOB1	30	18	130	140					270	38	0.140741	83.21	4.1605	50.1		1970.36		0.0192858
BOB1	29	18	130	343	252				725	242	0.333793	88.6	4.43	40		1256	Lost data no bloom	0.192675
BOB1	30	30	190	117	194	266	137		904	153	0.169248	69.33	3.4665		80	509.554		0.300263
BOB1	31	30	218	203					421	116	0.275534	82.9	4.145		82	535.35		0.216681
BOB1	34	30	241	256					497	134	0.269618	84.35	4.2175		75	447.85		0.299207
BOB1	38	30	174	284					458	93	0.203057	83.87	4.1935		62	306.051		0.303871
BOB1	40	31	168	136	137	159	110		710	154	0.216901	96.12	4.806		97	749.124		0.205573
BOB1	43	29	109	247	101	471			928	64	0.0689655	79.2	3.96		96	733.758		0.0872222
BOB1	45	28	128	102					230	59	0.256522	70.59	3.5295		67	357.404		0.165079
HB1	73	6	84	109					193	71	0.367876	80.85	4.0425	28.8		651.11		0.109044	0.169845	0.25686	4.01929
HB1	76	6	309						309	40	0.12945	75.94	3.797	30.9		749.526		0.0533671	0.0982953	0.0851939	0.237644
HB1	78	8	371	548					919	135	0.146899	70.3	3.7	32.3		818.983	19 weighed	0.164839	0.0219795	0.0190499	0.0531388
HB1	81	6	168						168	49	0.291667	83.25	4.1625	28.4		633.15		0.0773909
HB1	84	6	167	123	142				432	107	0.247685	80.77	4.0385	28.9		655.64		0.163199
HB1	87	5	288	193					481	152	0.316008	81.24	4.062	25.3		502.471		0.302505
HB1	90	8	200	187					387	97	0.250646	86.24	4.312	21.9		376.494		0.25764
HB1	89	19	163	125	127				415	110	0.26506	86.2	4.31	25.4		506.451		0.217198
HB1	87	17	135	147					282	109	0.386525	83.19	4.1595	22.6		400.947		0.271857
HB1	84	18	336	563					899	271	0.301446	71.38	3.569	32.5		829.156		0.326838
HB1	81	18	231	116	115				462	120	0.25974	80.18	4.009	34		907.46		0.132237
HB1	77	19	95	98					193	62	0.321244	83.02	4.151	26.7		559.619		0.11079
HB1	76	16	130	75					205	33	0.160976	88.57	4.4285	29.4		678.523		0.0486351
HB1	73	19	243	214					457	178	0.389497	88.36	4.418	45.3		1610.89		0.110498
HB1	73	29	98	105					203	50	0.246305	74.14	3.707		61	296.258	21 weighed	0.168772
HB1	76	30	141	130	187				458	101	0.220524	79.7	3.985		75	447.85	changed from data sheet	0.225522
HB1	78	30	139	150	41				330	57	0.172727	78.68	3.934		154	1888.22		0.0301872
HB1	82	30	122	148	188				458	51	0.111354	76.18	3.809		101	812.182		0.0627938
HB1	85	29	171	119					290	48	0.165517	82.23	4.1115		73	424.283		0.113132
HB1	87	32	148	95	177	155	103	98	776	217	0.279639	77.63	3.8815		87	602.627		0.36009
HB1	90	30	256						256	93	0.363281	76.35	3.8175		67	357.404		0.260209
BOB2	83	6	227	180					407	87	0.213759	81.08	4.054	41.9		1378.15		0.0631279	0.123531	0.281513	4.13766
BOB2	87	6	360						360	60	0.166667	100.46	5.023	38.2		1145.5		0.0523787	0.0928188	0.137991	0.474204
BOB2	89	6	179	252					431	147	0.341067	80.97	4.0485	31.8		793.823		0.18518	0.0207549	0.0308556	0.106035
BOB2	92	5	125	69					194	66	0.340206	70.59	3.71526	30.1		711.218	19 weighed	0.0927986
BOB2	96	6	182	151					333	113	0.339339	14.62	4.87333	25.6		514.458	3 weighed	0.219649
BOB2	98	7	26	37					63	3	0.047619	75.77	3.7885	40		1256		0.00238854
BOB2	100	4	173	225	193	202			793	312	0.393443	62.95	3.31316	33.3		870.479	19 weighed	0.358423
BOB2	100	19	229	187					416	165	0.396635	81.12	4.056	36.5		1045.82		0.157772
BOB2	98	17	164	167					331	89	0.268882	85.28	4.264	25.5		510.446		0.174357
BOB2	95	18	60	120					180	18	0.1	81.79	4.30474	23.5		433.516	19 weighed	0.0415209
BOB2	91	18	160	134					294	73	0.248299	65.92	3.296	32.1		808.872		0.0902492
BOB2	89	18	212	159					371	60	0.161725	84.87	4.2435	26.3		542.977		0.110502
BOB2	86	18	28	49					77	18	0.233766	87.7	3.98636	23.4		429.835	2 extra	0.0418766
BOB2	84	15	50	65					115	86	0.747826	79.6	3.98	33.6		886.234		0.0970399
BOB2	85	32	240	80	75	195	47		637	158	0.248038	104.24	5.212		118	1108.6		0.142522
BOB2	87	29	147	126					273	72	0.263736	79.21	3.9605		133	1408.36		0.0511233
BOB2	89	31	59	98					157	40	0.254777	80.9	4.045		60	286.624		0.139556
BOB2	92	31	63	136					199	61	0.306533	85.8	4.29		93	688.615		0.0885837
BOB2	94	31	91	99					190	48	0.252632	88.95	4.4475		92	673.885		0.0712287
BOB2	98	31	165	112	52				329	95	0.288754	78.88	3.944		59	277.15		0.342775
BOB2	100	29	104						104	31	0.298077	80.91	4.0455		74	435.987		0.071103
HB2	29	6	86						86	43	0.5	89.41	4.4705	24.3		463.535		0.0927654	0.183517	0.284851	4.16234
HB2	32	7	142	49	60	56			307	68	0.221498	92.08	4.604	29.7		692.441		0.0982034	0.110768	0.108757	0.378859
HB2	35	3	103	88	86				277	63	0.227437	85.53	4.2765	29.9		701.798		0.0897694	0.0254119	0.0256343	0.089298
HB2	38	5	139	98					237	60	0.253165	79.37	3.9685	20		314		0.191083
HB2	42	7	217	138					355	25	0.0704225	94	4.7	31.7		788.839		0.0316922
HB2	44	7	77	109					186	54	0.290323	67.87	3.6	18.7		274.507	19 weighed	0.196717
HB2	47	7	88	87	34	14			223	39	0.174888	95.67	4.7835	26		530.66		0.0734934
HB2	46	17	121	65					186	79	0.424731	79.56	3.978	35.8		1006.09		0.078522
HB2	45	18	203	147					350	144	0.411429	81	4.05	30		706.5		0.203822
HB2	41	17	224	168	369				761	251	0.329829	73.36	3.668	29.5		683.146		0.367418
HB2	38	18	182	78					260	46	0.176923	84.63	4.2315	17.9		251.522		0.182887
HB2	35	17	482	370					852	233	0.273474	83.8	4.19	35.7		1000.47		0.232889
HB2	32	18	128	130					258	51	0.197674	65.98	3.299	29.2		669.322		0.0761965
HB2	29	18	MISSING						0	95	0.283452	88.6	4.43	40		1256		0.0756369
HB2	46	30	80	90	112	115	84	48	529	164	0.310019	84.29	4.2145		82	535.35		0.306341
HB2	44	29	24	43	22	46			135	44	0.325926	83.3	4.165		49	191.162	missing	0.230171
HB2	41	31	41	95					136	23	0.169118	89.09	4.4545		46	168.471		0.136522
HB2	38	30	154	82	44	85			365	130	0.356164	81.94	4.097		87	602.627		0.215722
HB2	36	30	170	187					357	87	0.243697	88.88	4.444		65	336.385		0.258632
HB2	32	31	259	229					488	190	0.389344	79.93	3.9965		81	522.373		0.363725
HB2	28	30	126	175					301	118	0.392027	81.17	4.0585		61	296.258		0.398302
BOB3	119	6	122	76					198	27	0.136364	84.4	4.22	15.8		195.967		0.137778	0.128922	0.165502	3.94534
BOB3	122	6	144	101					245	64	0.261224	83.68	4.184	17.5		240.406		0.266216	0.10934	0.0720706	0.382258
BOB3	125	7	72	49					121	18	0.14876	83.31	4.62833	24.3		463.535	18 cherries	0.038832	0.0244492	0.0161155	0.0854754
BOB3	128	7	43	54					97	10	0.103093	40.49	4.049	19.6		301.566	10 cherries	0.0331603
BOB3	130	5	229	248					477	97	0.203354	78.5	3.925	34.1		912.806		0.106266
BOB3	133	5	93						93	16	0.172043	61.26	3.82875	24.5		471.196	16 cherries	0.0339561
BOB3	135	6	72						72	2	0.0277778	8.69	4.345	10.9		93.2659	2 cherries	0.0214441
BOB3	136	18	145	109					254	63	0.248031	71.49	3.5745	24.3		463.535		0.135912
BOB3	134	19	233	156					389	59	0.151671	95.15	4.7575	29.2		669.322		0.0881489
BOB3	131	19	91	66					157	24	0.152866	82.79	4.1395	30.2		715.951		0.0335218
BOB3	128	19	59	75	72	159	59		424	75	0.176887	77.35	3.8675	28.5		637.616		0.117626
BOB3	125	18	49	149					198	54	0.272727	79.18	3.959	21.1		349.49		0.154511
BOB3	123	18	161	226	16	22			425	82	0.192941	80.82	4.041	30.4		725.466		0.113031
BOB3	121	19	24	125					149	26	0.174497	78.46	3.923	19.7		304.651		0.0853437
BOB3	135	29	190	150					340	5	0.0147059	18	3.6		65	336.385	5 cherries	0.0148639
BOB3	134	30	90	28					118	22	0.186441	74.1	3.705		46	168.471		0.130586
BOB3	130	30	72	121					193	6	0.0310881	25.17	4.195		63	316.003	6 cherries	0.0189872
BOB3	129	30	114	44					158	28	0.177215	71.56	3.578		50	199.045		0.140672
BOB3	126	30	228	203					431	82	0.190255	75.27	3.7635		54	232.166		0.353196
BOB3	123	31	298	205					503	118	0.234592	64.51	3.2255		63	316.003		0.373414
BOB3	120	31	144	200	35				379	83	0.218997	66.86	3.343		58	267.834		0.309893
HB3	135	7	315	264					579	132	0.227979	72.27	3.6135	29.1		664.746		0.198572	0.112021	0.17507	3.82757
HB3	137	5	452	213					665	150	0.225564	79.21	3.9605	40		1256		0.119427	0.066541	0.062434	0.399203
HB3	140	6	123	54	229	132			538	140	0.260223	66.85	3.3425	34.4		928.938		0.15071	0.014879	0.0139607	0.0892645
HB3	144	7	131	108					239	63	0.263598	66.18	3.309	33		854.865		0.0736958
HB3	147	5	225	225					450	98	0.217778	66.8	3.34	26.1		534.75		0.183263
HB3	149	5	37	111					148	37	0.25	75.47	3.7735	29.4		678.523		0.0545302
HB3	151	6	87	72					159	35	0.220126	64.2	3.21	30.7		739.855		0.0473066
HB3	151	18	129	265					394	83	0.21066	85.77	4.2885	32.7		839.393		0.098881
HB3	149	18	219	265					484	54	0.11157	71.92	3.596	31.4		773.979		0.0697694
HB3	146	18	209	197					406	105	0.258621	72.43	3.6215	20.9		342.896		0.306215
HB3	143	20	70	66	18				154	22	0.142857	77.53	3.8765	26.6		555.435		0.0396086
HB3	140	19	262	212					474	103	0.2173	86.32	4.316	25.4		506.451		0.203376
HB3	138	19	166	145	39	63			413	42	0.101695	86.52	4.326	21.2		352.81		0.119044
HB3	135	19	180	114	384	25			703	48	0.0682788	82.04	4.102	39		1193.99		0.0402015
HB3	135	28	153	64					217	27	0.124424	73.53	3.6765		59	277.15		0.0974203
HB3	137	29	216	163					379	53	0.139842	77.25	3.8625		81	522.373		0.10146
HB3	140	29	366	284					650	70	0.107692	81.79	4.0895		112	998.726		0.0700893
HB3	144	29	114	173	8	89			384	45	0.117188	86.58	4.329		103	844.666		0.0532755
HB3	146	30	23	163	126				312	45	0.144231	80.16	4.008		75	447.85		0.10048
HB3	148	31	121	155	42	130			448	62	0.138393	89.58	4.479		75	447.85		0.138439
HB3	151	30	238	377					615	79	0.128455	65.18	3.259		107	911.545		0.0866661

## Sheet: 2018CherryYield
Treatment	Block	Row	Tree	Blossoms	Fruit	Fruit Set	Weight	Notes	Adj Weight	Branch	Adj Branch	LCSA (mm)	Avg Unit Wt	fruit/x-sect	set/x-sect	WT/X-SECT	cherry weight	AVERAGES	Fruit Set	Adj Weight	fruit/x-sect	set/x-sect	WT/X-SECT	Indiv wt
BOB	1	58	4	119	40	0.336134	67		67	8.15	52.1681	521.681	3.35	0.0766752	0.00644329	1.28431	3.35	BOB1	0.315508	66.8571	0.0673815	0.00610054	1.26062	3.34286
BOB	1	58	8	118	60	0.508475	66	UNDERRIPE	66	7.62	45.6037	456.037	3.3	0.131568	0.0111499	1.44725	3.3		0.0175245	1.38435	0.00804858	0.00103122	0.183372	0.0692176
BOB	1	58	14	152	49	0.322368	67		67	8.67	59.0375	590.375	3.35	0.0829981	0.0054604	1.13487	3.35	BOB2	0.32336	64.381	0.0669018	0.00644214	1.28	3.21905
BOB	1	58	17	122	42	0.344262	78		78	6.66	34.8368	348.368	3.9	0.120562	0.00988214	2.23901	3.9		0.0163187	1.70657	0.00985761	0.00168521	0.352197	0.0853285
BOB	1	58	19	147	56	0.380952	55		55	8.54	57.2803	572.803	2.75	0.0977648	0.00665066	0.96019	2.75	BOB3	0.254816	76.25	0.0522058	0.00526808	1.53183	3.8125
BOB	1	58	26	71	26	0.366197	71		71	4.74	17.646	176.46	3.55	0.147342	0.0207524	4.02357	3.55		0.0261985	1.5319	0.0121136	0.000898445	0.166803	0.0765949
BOB	1	58	35	98	40	0.408163	73		73	9.54	71.4803	714.803	3.65	0.0559594	0.00571015	1.02126	3.65	HB4	0.298796	76.381	0.0554442	0.0045803	1.20162	3.81905
BOB	1	66	31	149	55	0.369128	63		63	3.6	103.132	1031.32	3.15	0.0533295	0.00357916	0.610865	3.15		0.0152865	1.69776	0.00793184	0.000606342	0.156537	0.0848879
BOB	1	66	27	164	47	0.286585	66		66	5	198.944	1989.44	3.3	0.0236248	0.00144054	0.331752	3.3	HB5	0.311937	67.5238	0.0574797	0.00547771	1.23808	3.37619
BOB	1	66	26	84	31	0.369048	59		59	1.8	25.7831	257.831	2.95	0.120234	0.0143135	2.28832	2.95		0.0212777	1.91131	0.00560521	0.000496058	0.112429	0.0955654
BOB	1	66	18	86	23	0.267442	56		56	2.6	53.7944	537.944	2.8	0.0427554	0.00497156	1.041	2.8	HB6	0.29784	72.7	0.0533342	0.00601009	1.50053	3.635
BOB	1	66	8	193	54	0.279793	67		67	4	127.324	1273.24	3.35	0.0424115	0.00219749	0.526217	3.35		0.021848	2.04566	0.00594514	0.000629288	0.133209	0.102283
BOB	1	66	5	102	35	0.343137	64		64	2.7	58.012	580.12	3.2	0.0603324	0.00591494	1.10322	3.2
BOB	1	66	2	110	32	0.290909	69		69	2.5	49.7359	497.359	3.45	0.0643398	0.00584907	1.38733	3.45	POOLED TRT						circ
BOB	1	74	6	163	29	0.177914	67		67	2.9	66.9247	669.247	3.35	0.0433323	0.00265842	1.00113	3.35	BOB	0.297895	69.1627	0.062163	0.00593692	1.35748	68.3565
BOB	1	74	9	110	27	0.245455	67		67	2.7	58.012	580.12	3.35	0.0465421	0.0042311	1.15493	3.35	HB	0.302858	72.2016	0.0554194	0.00535603	1.31341	67.1675
BOB	1	74	11	129	37	0.286822	78		78	3.7	108.942	1089.42	3.9	0.0339632	0.0026328	0.71598	3.9
BOB	1	74	20	108	35	0.324074	70		70	3.5	97.4824	974.824	3.5	0.0359039	0.00332444	0.718078	3.5
BOB	1	74	26	93	26	0.27957	59		59	2.6	53.7944	537.944	2.95	0.0483322	0.00519701	1.09677	2.95
BOB	1	74	33	140	42	0.3	69		69	4.2	140.375	1403.75	3.45	0.0299199	0.00213714	0.491542	3.45
BOB	1	74	35	158	22	0.139241	73		73	2.2	38.5155	385.155	3.65	0.0571199	0.00361518	1.89534	3.65
HB	1	29	34	116	29	0.25	75		75	5.69	25.4281	254.281	3.75	0.114047	0.00983163	2.94949	3.75
HB	1	29	32	195	81	0.415385	57		57	9.45	70.138	701.38	2.85	0.115487	0.00592239	0.812683	2.85
HB	1	29	25	88	27	0.306818	71		71	7.78	47.5389	475.389	3.55	0.0567956	0.00645405	1.49351	3.55
HB	1	29	23	116	40	0.344828	76		76	10.86	92.6295	926.295	3.8	0.0431828	0.00372265	0.820473	3.8
HB	1	29	13	77	9	0.116883	81		81	7.73	46.9298	469.298	4.05	0.0191776	0.00249059	1.72598	4.05
HB	1	29	8	82	27	0.329268	74		74	9.84	76.0466	760.466	3.7	0.0355045	0.00432982	0.973087	3.7
HB	1	29	4	134	42	0.313433	67		67	11.5	103.869	1038.69	3.35	0.0404356	0.00301758	0.645044	3.35
HB	1	37	1	263	86	0.326996	77		77	3.6	103.132	1031.32	3.85	0.083388	0.00317064	0.746613	3.85
HB	1	37	6	150	42	0.28	77		77	5	198.944	1989.44	3.85	0.0211115	0.00140743	0.387044	3.85
HB	1	37	13	114	39	0.342105	79		79	1.8	25.7831	257.831	3.95	0.151262	0.0132686	3.06402	3.95
HB	1	37	15	107	30	0.280374	80		80	2.6	53.7944	537.944	4	0.0557679	0.00521195	1.48714	4
HB	1	37	23	100	30	0.3	92		92	4	127.324	1273.24	4.6	0.0235619	0.00235619	0.722566	4.6
HB	1	37	27	131	35	0.267176	83		83	2.7	58.012	580.12	4.15	0.0603324	0.00460552	1.43074	4.15
HB	1	37	30	152	42	0.276316	83		83	2.5	49.7359	497.359	4.15	0.084446	0.00555566	1.66881	4.15
HB	1	45	5	80	35	0.4375	80		80	3.2	81.4873	814.873	4	0.0429515	0.00536893	0.981748	4
HB	1	45	8	79	18	0.227848	74		74	3.1	76.474	764.74	3.7	0.0235374	0.00297942	0.96765	3.7
HB	1	45	12	117	40	0.34188	84		84	3.8	114.91	1149.1	4.2	0.0348099	0.0029752	0.731008	4.2
HB	1	45	16	183	48	0.262295	70		70	3.3	86.6599	866.599	3.5	0.055389	0.00302672	0.807756	3.5
HB	1	45	20	86	27	0.313953	65		65	3.5	97.4824	974.824	3.25	0.0276973	0.00322062	0.666787	3.25
HB	1	45	27	118	25	0.211864	82		82	3	71.6197	716.197	4.1	0.0349066	0.00295819	1.14494	4.1
HB	1	45	33	94	31	0.329787	77		77	3.1	76.474	764.74	3.85	0.0405367	0.00431241	1.00688	3.85
BOB	2	155	33	112	32	0.285714	68		68	7.51	44.2965	442.965	3.4	0.0722404	0.00645004	1.53511	3.4
BOB	2	155	30	155	26	0.167742	78		78	10.03	79.0118	790.118	3.9	0.0329065	0.002123	0.987195	3.9
BOB	2	155	26	126	46	0.365079	62		62	11.32	100.643	1006.43	3.1	0.0457062	0.00362748	0.61604	3.1
BOB	2	155	20	166	33	0.198795	56		56	9.52	71.1809	711.809	2.8	0.0463607	0.00279281	0.786727	2.8
BOB	2	155	13	109	40	0.366972	57		57	8.21	52.9391	529.391	2.85	0.0755586	0.00693198	1.07671	2.85
BOB	2	155	10	137	54	0.394161	57		57	7.39	42.8922	428.922	2.85	0.125897	0.00918955	1.32891	2.85
BOB	2	155	5	153	54	0.352941	66		66	8.9	62.2114	622.114	3.3	0.0868008	0.00567326	1.0609	3.3
BOB	2	167	33	84	31	0.369048	67		67	3.2	81.4873	814.873	3.35	0.0380427	0.0045289	0.822214	3.35
BOB	2	167	25	187	73	0.390374	78		78	4.3	147.139	1471.39	3.9	0.049613	0.0026531	0.530112	3.9
BOB	2	167	3	84	33	0.392857	68		68	3	71.6197	716.197	3.4	0.0460767	0.00548532	0.949459	3.4
BOB	2	167	5	62	19	0.306452	54		54	2.5	49.7359	497.359	2.7	0.0382018	0.00616158	1.08573	2.7
BOB	2	167	9	90	15	0.166667	69		69	3.1	76.474	764.74	3.45	0.0196145	0.00217939	0.902268	3.45
BOB	2	167	13	148	54	0.364865	47	ONLY 19 CH	50	2.1	35.0937	350.937	2.5	0.153874	0.0103969	1.33927	2.63158
BOB	2	167	16	53	16	0.301887	64		64	1	7.95775	79.5775	3.2	0.201062	0.0379362	8.04248	3.2
BOB	2	175	4	136	36	0.264706	68		68	3	71.6197	716.197	3.4	0.0502655	0.00369599	0.949459	3.4
BOB	2	175	13	131	44	0.335878	53		53	3.4	91.9916	919.916	2.65	0.0478305	0.00365118	0.57614	2.65
BOB	2	175	19	126	46	0.365079	65	UNDERRIPE	65	3.8	114.91	1149.1	3.25	0.0400314	0.00317709	0.565661	3.25
BOB	2	175	24	129	40	0.310078	67		67	2.7	58.012	580.12	3.35	0.0689513	0.00534506	1.15493	3.35
BOB	2	175	26	156	57	0.365385	64		64	4	127.324	1273.24	3.2	0.0447677	0.00286972	0.502655	3.2
BOB	2	175	33	79	24	0.303797	68		68	2.7	58.012	580.12	3.4	0.0413708	0.00523681	1.17217	3.4
BOB	2	175	35	154	65	0.422078	73		73	3.2	81.4873	814.873	3.65	0.079767	0.00517968	0.895845	3.65
HB	2	169	3	83	31	0.373494	64		64	11.61	105.865	1058.65	3.2	0.0292824	0.00352801	0.604541	3.2
HB	2	169	5	72	25	0.347222	71		71	9.97	78.0693	780.693	3.55	0.0320228	0.00444762	0.909449	3.55
HB	2	169	13	97	10	0.103093	62		62	6.52	33.3876	333.876	3.1	0.0299512	0.00308776	1.85698	3.1
HB	2	169	19	99	32	0.323232	59		59	8.64	58.6297	586.297	2.95	0.0545799	0.00551312	1.00632	2.95
HB	2	169	26	130	25	0.192308	57		57	5.61	24.7181	247.181	2.85	0.10114	0.00778003	2.306	2.85
HB	2	169	28	156	56	0.358974	71		71	7.51	44.2965	442.965	3.55	0.126421	0.00810389	1.60283	3.55
HB	2	169	32	146	32	0.219178	50		50	10.92	93.6559	936.559	2.5	0.0341676	0.00234025	0.533869	2.5
HB	2	177	6	95	22	0.231579	84		84	2.4	45.8366	458.366	4.2	0.0479966	0.00505227	1.8326	4.2
HB	2	177	11	105	26	0.247619	78		78	2.3	42.0965	420.965	3.9	0.0617629	0.00588218	1.85289	3.9
HB	2	177	13	132	45	0.340909	56		56	2.9	66.9247	669.247	2.8	0.0672398	0.00509392	0.836762	2.8
HB	2	177	19	118	57	0.483051	68		68	3	71.6197	716.197	3.4	0.079587	0.00674466	0.949459	3.4
HB	2	177	20	97	41	0.42268	64		64	2.8	62.3887	623.887	3.2	0.065717	0.00677495	1.02583	3.2
HB	2	177	29	85	34	0.4	65		65	2.4	45.8366	458.366	3.25	0.0741765	0.00872665	1.41808	3.25
HB	2	177	32	73	31	0.424658	69	ONLY 18 CH	77	2.2	38.5155	385.155	3.85	0.0804871	0.0110256	1.79149	4.27778
HB	2	185	4	133	45	0.338346	83		83	4.4	154.062	1540.62	4.15	0.029209	0.00219617	0.538744	4.15
HB	2	185	7	139	56	0.402878	70		70	3.3	86.6599	866.599	3.5	0.0646205	0.00464895	0.807756	3.5
HB	2	185	15	96	27	0.28125	65		65	2.7	58.012	580.12	3.25	0.0465421	0.00484814	1.12046	3.25
HB	2	185	18	89	31	0.348315	72		72	2.9	66.9247	669.247	3.6	0.0463207	0.00520458	1.07584	3.6
HB	2	185	28	144	31	0.215278	69		69	3.1	76.474	764.74	3.45	0.0405367	0.00281505	0.902268	3.45
HB	2	185	32	96	19	0.197917	65		65	2.3	42.0965	420.965	3.25	0.0451344	0.0047015	1.54407	3.25
HB	2	185	36	77	23	0.298701	68		68	2.4	45.8366	458.366	3.4	0.0501782	0.00651665	1.48353	3.4
BOB	3	70	9	79	15	0.189873	76		76	6.37	31.869	318.69	3.8	0.0470676	0.00595793	2.38476	3.8
BOB	3	70	13	98	27	0.27551	72		72	9.76	74.8151	748.151	3.6	0.036089	0.00368255	0.962372	3.6
BOB	3	70	16	112	43	0.383929	70		70	10.25	82.5159	825.159	3.5	0.0521112	0.00465278	0.848321	3.5
BOB	3	70	21	107	24	0.224299	76		76	7.15	40.1515	401.515	3.8	0.0597736	0.00558632	1.89283	3.8
BOB	3	70	28	144	50	0.347222	88		88	8.84	61.3754	613.754	4.4	0.0814658	0.00565735	1.4338	4.4
BOB	3	70	34	73	18	0.246575	89		89	6.4	32.1699	321.699	4.45	0.0559529	0.00766478	2.76656	4.45
BOB	3	70	36	56	17	0.303571	74		74	6.82	36.5308	365.308	3.7	0.0465361	0.00831002	2.02569	3.7
BOB	3	78	35	87	19	0.218391	67		67	2.7	58.012	580.12	3.35	0.0327519	0.00376458	1.15493	3.35
BOB	3	78	28	28	2	0.0714286	82		82	3.5	97.4824	974.824	4.1	0.00205165	0.000732733	0.841177	4.1
BOB	3	78	27	98	54	0.55102	71		71	2.9	66.9247	669.247	3.55	0.0806878	0.00823344	1.06089	3.55
BOB	3	78	18	112	17	0.151786	75		75	2.3	42.0965	420.965	3.75	0.0403834	0.00360566	1.78162	3.75
BOB	3	78	16	61	16	0.262295	70		70	3.3	86.6599	866.599	3.5	0.018463	0.00302672	0.807756	3.5
BOB	3	78	1	135	61	0.451852	80		80	1.7	22.9979	229.979	4	0.265242	0.0196475	3.47858	4
BOB	3	86	3	115	14	0.121739	78		78	2.1	35.0937	350.937	3.9	0.0398932	0.00346898	2.22262	3.9
BOB	3	86	4	121	26	0.214876	77		77	2.8	62.3887	623.887	3.85	0.0416742	0.00344415	1.2342	3.85
BOB	3	86	10	63	21	0.333333	76		76	2.5	49.7359	497.359	3.8	0.042223	0.00670206	1.52807	3.8
BOB	3	86	16	93	15	0.16129	60	ONLY 19 CH	63	3.5	97.4824	974.824	3.15	0.0153874	0.00165456	0.615496	3.31579
BOB	3	86	27	97	26	0.268041	73		73	2.6	53.7944	537.944	3.65	0.0483322	0.0049827	1.35702	3.65
BOB	3	86	33	86	17	0.197674	81		81	2.7	58.012	580.12	4.05	0.0293043	0.00340748	1.39626	4.05
BOB	3	86	34	74	9	0.121622	87		87	3.6	103.132	1031.32	4.35	0.00872665	0.00117928	0.843576	4.35
HB	3	99	3	125	45	0.36	69		69	13.89	151.529	1515.29	3.45	0.0296974	0.00237579	0.45536	3.45
HB	3	99	4	67	24	0.358209	64		64	7.29	41.7393	417.393	3.2	0.0574998	0.00858206	1.53333	3.2
HB	3	99	10	81	21	0.259259	53		53	5.95	27.8051	278.051	2.65	0.0755258	0.00932418	1.90613	2.65
HB	3	99	15	74	12	0.162162	75		75	8.73	59.8575	598.575	3.75	0.0200476	0.00270914	1.25298	3.75
HB	3	99	21	161	18	0.111801	81		81	7.53	44.5328	445.328	4.05	0.0404197	0.00251054	1.81888	4.05
HB	3	99	31	73	18	0.246575	68		68	6.39	32.0695	320.695	3.4	0.0561282	0.00768879	2.1204	3.4
HB	3	99	33	56	9	0.160714	82		82	8.55	57.4146	574.146	4.1	0.0156755	0.00279919	1.42821	4.1
HB	3	107	29	94	27	0.287234	65		65	2.9	66.9247	669.247	3.25	0.0403439	0.0042919	0.971241	3.25
HB	3	107	22	74	28	0.378378	74		74	2.4	45.8366	458.366	3.7	0.0610865	0.00825494	1.61443	3.7
HB	3	107	16	67	26	0.38806	75		75	2	31.831	318.31	3.75	0.0816814	0.0121913	2.35619	3.75
HB	3	107	8	126	23	0.18254	59		59	2.3	42.0965	420.965	2.95	0.0546364	0.00433622	1.40154	2.95
HB	3	107	5	84	17	0.202381	77		77	1.9	28.7275	287.275	3.85	0.0591768	0.00704486	2.68036	3.85
HB	3	107	3	125	48	0.384	90		90	2.1	35.0937	350.937	4.5	0.136777	0.0109421	2.56457	4.5
HB	3	115	3	66	27	0.409091	65		65	3.2	81.4873	814.873	3.25	0.033134	0.0050203	0.79767	3.25
HB	3	115	6	92	22	0.23913	75	ONLY 18 CH	83	2.5	49.7359	497.359	4.15	0.0442336	0.004808	1.50796	4.16667
HB	3	115	11	53	19	0.358491	72		72	2.7	58.012	580.12	3.6	0.0327519	0.0061796	1.24112	3.6
HB	3	115	17	81	29	0.358025	79		79	3	71.6197	716.197	3.95	0.0404916	0.00499897	1.10305	3.95
HB	3	115	24	97	35	0.360825	74		74	2.6	53.7944	537.944	3.7	0.0650626	0.00670748	1.37561	3.7
HB	3	115	30	193	56	0.290155	66		66	3.1	76.474	764.74	3.3	0.0732275	0.00379417	0.863039	3.3
HB	3	115	35	87	40	0.45977	83		83	3.2	81.4873	814.873	4.15	0.0490874	0.00564223	1.01856	4.15
